# Supplementary material for: Advanced techniques in dobutamine stress echocardiography: focus on myocardial deformation analysis
Source: HighWire-hosted journal article supplement (doi:10.1136/heartjnl-2013-303850), 2014-04-23
Supplement: heartjnl-2013-303850supp.pdf [file heartjnl-2013-303850supp.pdf]

## References for inclusion on the Heart website

- w1 Schinkel AF, Bax JJ, Geleijnse ML, *et al.* Noninvasive evaluation of ischaemic heart disease: myocardial perfusion imaging or stress echocardiography? *Eur Heart J* 2003;24:789-800.
- w2 Franke A, Hoffmann R, Kuhl HP, *et al.* Non-contrast second harmonic imaging improves interobserver agreement and accuracy of dobutamine stress echocardiography in patients with impaired image quality. *Heart* 2000;83:133-40.
- w3 Hundley WG, Kizilbash AM, Afridi I, *et al.* Administration of an intravenous perfluorocarbon contrast agent improves echocardiographic determination of left ventricular volumes and ejection fraction: comparison with cine magnetic resonance imaging. *J Am Coll Cardiol* 1998;32:1426-32.
- w4 Rainbird AJ, Mulvagh SL, Oh JK, *et al.* Contrast dobutamine stress echocardiography: clinical practice assessment in 300 consecutive patients. *J Am Soc Echocardiogr* 2001;14:378-85.
- w5 Dolan MS, Gala SS, Dodla S, *et al.* Safety and efficacy of commercially available ultrasound contrast agents for rest and stress echocardiography a multicenter experience. *J Am Coll Cardiol* 2009;53:32-8.
- w6 Abdelmoneim SS, Bernier M, Scott CG, *et al.* Safety of contrast agent use during stress echocardiography: a 4-year experience from a single-center cohort study of 26,774 patients. *JACC Cardiovasc Imaging* 2009;2:1048-56.
- w7 Weiss RJ, Ahmad M, Villanueva F, *et al.* CaRES (Contrast Echocardiography Registry for Safety Surveillance): a prospective multicenter study to evaluate the safety of the ultrasound contrast agent definity in clinical practice. *J Am Soc Echocardiogr* 2012;25:790-5.
- w8 Khawaja OA, Shaikh KA, Al-Mallah MH. Meta-analysis of adverse cardiovascular events associated with echocardiographic contrast agents. *Am J Cardiol* 2010;106:742-7.

- w9 Anantharam B, Chahal N, Chelliah R, *et al.* Safety of contrast in stress echocardiography in stable patients and in patients with suspected acute coronary syndrome but negative 12-hour troponin. *Am J Cardiol* 2009;104:14-8.
- w10 Mirsky I, Parmley WW. Assessment of passive elastic stiffness for isolated heart muscle and the intact heart. *Circulation research* 1973;33:233-43.
- w11 Voigt JU, Lindenmeier G, Exner B, Regenfus M, Werner D, Reulbach U *et al.* Incidence and characteristics of segmental postsystolic longitudinal shortening in normal, acutely ischemic, and scarred myocardium. *J Am Soc Echocardiogr* 2003; 16(5):415-423
- w12 Geleijnse ML, Fioretti PM, Roelandt JR. Methodology, feasibility, safety and diagnostic accuracy of dobutamine stress echocardiography. *J Am Coll Cardiol* 1997;30:595-606.
- w13 Reimer KA, Jennings RB. The "wavefront phenomenon" of myocardial ischemic cell death. II. Transmural progression of necrosis within the framework of ischemic bed size (myocardium at risk) and collateral flow. *Lab Invest* 1979;40:633-44.
- w14 Allman KC, Shaw LJ, Hachamovitch R, *et al.* Myocardial viability testing and impact of revascularization on prognosis in patients with coronary artery disease and left ventricular dysfunction: a meta-analysis. *J Am Coll Cardiol* 2002;39:1151-8.
- w15 Picano E, Lattanzi F, Orlandini A, *et al.* Stress echocardiography and the human factor: the importance of being expert. *J Am Coll Cardiol* 1991;17:666-9.
- w16 Weidemann F, Dommke C, Bijmens B, *et al.* Defining the transmural extent of a chronic myocardial infarction by ultrasonic strain-rate imaging: implications for identifying intramural viability: an experimental study. *Circulation* 2003;107:883-8.
- w17 Chan J, Hanekom L, Wong C, *et al.* Differentiation of subendocardial and transmural infarction using two-dimensional strain rate imaging to assess short-axis and long-axis myocardial function. *J Am Coll Cardiol* 2006;48:2026-33.

w18 Masugata H, Lafitte S, Peters B, *et al.* Comparison of real-time and intermittent triggered myocardial contrast echocardiography for quantification of coronary stenosis severity and transmural perfusion gradient. *Circulation* 2001;104:1550-6.

w19 Sawada SG, Thomaides A. Three-dimensional stress echocardiography: the promise and limitations of volumetric imaging. *Current opinion in cardiology* 2009;24:426-32.
